# Supplementary material for: Variability in radiotherapy outcomes across cancer types: a comparative study of glioblastoma multiforme and low-grade gliomas
Source: publisher site journal article supplement (doi:10.18632/aging.206212), 2025-02-27
Supplement: Supplementary file [file aging-v17i2-206212-supplementary-material-SD1.pdf]

## SUPPLEMENTARY FIGURE

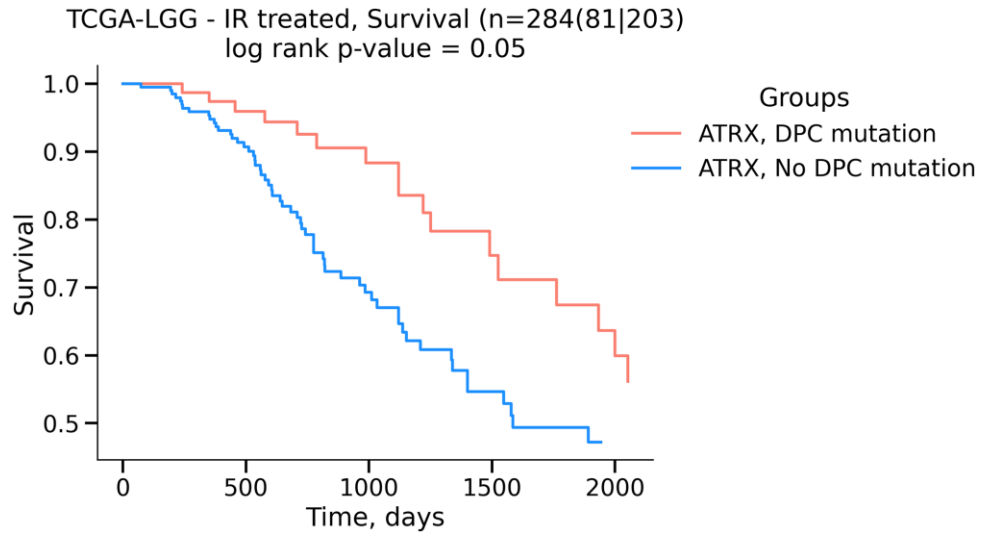

Supplementary Figure 1. Survival analysis for the group of LGG patients who received radiation therapy and carried disruptive protein-coding mutations in the ATRX gene compared to radiotherapy-treated patients without disruptive protein-coding mutations in the ATRX gene.
