# Supplementary material for: Variability in radiotherapy outcomes across cancer types: a comparative study of glioblastoma multiforme and low-grade gliomas
Source: publisher site journal article supplement (doi:10.18632/aging.206212), 2025-02-27
Supplement: Supplementary file [file aging-v17i2-206212-supplementary-material-SD2.pdf]

## SUPPLEMENTARY TABLES

**Supplementary Table 1. Original names of the mutations and their categories in all available TCGA data mutation types.**

| All detected mutations in TCGA cancers | Category                  |
|----------------------------------------|---------------------------|
| missense_variant                       | Protein coding            |
| splice_acceptor_variant                | Splice site               |
| intron_variant                         | Splice site               |
| frameshift_variant                     | Disruptive protein coding |
| mature_miRNA_variant                   | Noncoding                 |
| stop_lost                              | Disruptive protein coding |
| downstream_gene_variant                | Noncoding                 |
| regulatory_region_variant              | Noncoding                 |
| splice_region_variant                  | Splice site               |
| non_coding_transcript_exon_variant     | Splice site               |
| intergenic_variant                     | Noncoding                 |
| start_lost                             | Disruptive protein coding |
| splice_donor_variant                   | Splice site               |
| coding_sequence_variant                | Protein coding            |
| non_coding_transcript_variant          | Noncoding                 |
| stop_retained_variant                  | Protein coding            |
| protein_altering_variant               | Protein coding            |
| NMD_transcript_variant                 | Disruptive protein coding |
| upstream_gene_variant                  | Noncoding                 |
| incomplete_terminal_codon_variant      | Protein coding            |
| inframe_insertion                      | Disruptive protein coding |
| inframe_deletion                       | Disruptive protein coding |
| synonymous_variant                     | Protein coding            |
| 3_prime_UTR_variant                    | Noncoding                 |
| 5_prime_UTR_variant                    | Noncoding                 |
| stop_gained                            | Disruptive protein coding |

**Supplementary Table 2. TCGA cancer abbreviations and their full names.**

| TCGA abbreviation | Cancer                                                           |
|-------------------|------------------------------------------------------------------|
| TCGA-GBM          | Glioblastoma multiforme                                          |
| TCGA-THYM         | Thymoma                                                          |
| TCGA-BRCA         | Breast invasive carcinoma                                        |
| TCGA-CESC         | Cervical squamous cell carcinoma and endocervical adenocarcinoma |
| TCGA-KIRP         | Kidney renal papillary cell carcinoma                            |
| TCGA-SKCM         | Skin Cutaneous Melanoma                                          |
| TCGA-DLBC         | Lymphoid Neoplasm Diffuse Large B-cell Lymphoma                  |
| TCGA-THCA         | Thyroid carcinoma                                                |
| TCGA-PRAD         | Prostate adenocarcinoma                                          |
| TCGA-PCPG         | Pheochromocytoma and Paraganglioma                               |
| TCGA-MESO         | Mesothelioma                                                     |
| TCGA-READ         | Rectum adenocarcinoma                                            |
| TCGA-SARC         | Sarcoma                                                          |

|           |                                       |
|-----------|---------------------------------------|
| TCGA-LUSC | Lung squamous cell carcinoma          |
| TCGA-TGCT | Testicular Germ Cell Tumors           |
| TCGA-LIHC | Liver hepatocellular carcinoma        |
| TCGA-UCEC | Uterine Corpus Endometrial Carcinoma  |
| TCGA-ESCA | Esophageal carcinoma                  |
| TCGA-STAD | Stomach adenocarcinoma                |
| TCGA-ACC  | Adrenocortical carcinoma              |
| TCGA-COAD | Colon adenocarcinoma                  |
| TCGA-KIRC | Kidney renal clear cell carcinoma     |
| TCGA-BLCA | Bladder Urothelial Carcinoma          |
| TCGA-OV   | Ovarian serous cystadenocarcinoma     |
| TCGA-CHOL | Cholangio carcinoma                   |
| TCGA-UVM  | Uveal Melanoma                        |
| TCGA-LUAD | Lung adenocarcinoma                   |
| TCGA-KICH | Kidney Chromophobe                    |
| TCGA-PAAD | Pancreatic adenocarcinoma             |
| TCGA-LGG  | Brain Lower Grade Glioma              |
| TCGA-UCS  | Uterine Carcinosarcoma                |
| TCGA-HNSC | Head and Neck squamous cell carcinoma |

---
